# Supplementary material
Source: PubMed Central journal article supplement (PMC8361457)
Supplement: advancesADV2020003985-suppl1.pdf [file advancesADV2020003985-suppl1.pdf]

## Supplemental material

### Supplemental tables

Supplemental Table 1. Primer and probe sequences

|                                         | Name                                                          | Sequence                  |
|-----------------------------------------|---------------------------------------------------------------|---------------------------|
| <i>FCGR2A R131H</i><br><i>rs1801274</i> | Forward PCR primer                                            | CATATATTGCCTATAAGAGAATGCT |
|                                         | Reverse PCR primer                                            | CCTGACTACCTATTACCTGGGA    |
| <i>FCGR2B I232T</i><br><i>rs1050501</i> | Floto et al. 2005 <sup>1</sup> forward primer                 | AAGGGGAGCCCTTCCCTCTGTT    |
|                                         | Floto et al. 2005 <sup>1</sup> reverse primer                 | CATCACCCACCATGTCTCAC      |
|                                         | Custom TaqMan forward primer                                  | GATGGGGATCATTGTGGCTGT     |
|                                         | Custom TaqMan reverse primer                                  | AGGCCACTACAGCAGCAACAAT    |
|                                         | Custom TaqMan 232I probe                                      | ACTGGGATTGCTGTAGC         |
|                                         | Custom TaqMan 232T probe                                      | ACTGGGACTGCTGTAGC         |
|                                         | Alternative <i>FCGR2B</i> -specific sequencing forward primer | CTGCCTGCTCACAAATGTA       |
|                                         | Alternative <i>FCGR2B</i> -specific sequencing reverse primer | CACTGCTCTCCCCAAGAC        |
| <i>FCGR3A F158V</i><br><i>rs396991</i>  | Forward PCR primer                                            | CCTCTAATAGGGCAATTCATCATT  |
|                                         | Reverse PCR and sequencing primer                             | AGATGTGGCTTCTGCTCCTG      |
|                                         | Forward sequencing primer                                     | TGCTCTGCATAAGGTCACATATT   |

*FCGR*, Fc gamma receptor; PCR, polymerase chain reaction.

**Supplemental Table 2. Fc gamma receptor (FcγR) genotype prevalence by ethnicity in (A) patients with follicular lymphoma (FL) in the GALLIUM trial and (B) patients with diffuse large B-cell lymphoma (DLBCL) in the GOYA trial.**

**A**

| Covariate     | Subgroup | Asian, No. (%) | White, No. (%) | Other, No. (%) | P-value |
|---------------|----------|----------------|----------------|----------------|---------|
| <i>FCGR2A</i> | R131R    | 23 (12.5)      | 200 (21.6)     | 8 (22.9)       | <.0001  |
|               | R131H    | 73 (39.7)      | 459 (49.6)     | 15 (42.9)      |         |
|               | H131H    | 88 (47.8)      | 266 (28.8)     | 12 (34.3)      |         |
| <i>FCGR2B</i> | I232I    | 88 (68.2)      | 712 (79.2)     | 23 (67.6)      | .008    |
|               | I232T    | 35 (27.1)      | 174 (19.4)     | 11 (32.4)      |         |
|               | T232T    | 6 (4.7)        | 13 (1.4)       | 0 (0.0)        |         |
| <i>FCGR3A</i> | F158F    | 92 (50.0)      | 373 (40.3)     | 14 (40.0)      | 0.2     |
|               | F158V    | 72 (39.1)      | 432 (46.7)     | 17 (48.6)      |         |
|               | V158V    | 20 (10.9)      | 120 (13.0)     | 4 (11.4)       |         |

**B**

| Covariate     | Subgroup | Asian, No. (%) | White, No. (%) | Other, No. (%) | P-value |
|---------------|----------|----------------|----------------|----------------|---------|
| <i>FCGR2A</i> | R131R    | 102 (35.1)     | 175 (60.1)     | 14 (4.8)       | .0002   |
|               | R131H    | 181 (30.4)     | 393 (66.1)     | 21 (3.5)       |         |
|               | H131H    | 177 (41.2)     | 249 (57.9)     | 4 (0.9)        |         |
| <i>FCGR2B</i> | I232I    | 145 (58.0)     | 597 (75.4)     | 31 (81.6)      | <.0001  |
|               | I232T    | 93 (37.2)      | 182 (23.0)     | 7 (18.4)       |         |
|               | T232T    | 12 (4.8)       | 13 (1.6)       | 0 (0)          |         |
| <i>FCGR3A</i> | F158F    | 245 (53.7)     | 324 (39.6)     | 22 (56.4)      | <.0001  |

|       |            |            |           |
|-------|------------|------------|-----------|
| F158V | 176 (38.6) | 382 (46.7) | 16 (41.0) |
| V158V | 35 (7.7)   | 112 (13.7) | 1 (2.6)   |

*FCGR*, Fc gamma receptor.

**Supplemental Table 3. Fc gamma receptor (FcγR) genotype prevalence by cell of origin (COO; activated B-cell [ABC] and germinal center B-cell [GCB]) in patients with diffuse large B-cell lymphoma (DLBCL) in the GOYA trial.**

| Covariate     | Subgroup | COO (ABC, GCB) |              | P-value* |
|---------------|----------|----------------|--------------|----------|
|               |          | GCB, No. (%)   | ABC, No. (%) |          |
| <i>FCGR2A</i> | R131R    | 99 (19.08)     | 39 (16.53)   | .6590    |
|               | R131H    | 232 (44.7)     | 112 (47.46)  |          |
|               | H131H    | 188 (36.22)    | 85 (36.02)   |          |
| <i>FCGR2B</i> | I232I    | 362 (72.69)    | 166 (71.86)  | .9429    |
|               | I232T    | 124 (24.9)     | 59 (25.54)   |          |
|               | T232T    | 12 (2.41)      | 6 (2.6)      |          |
| <i>FCGR3A</i> | F158F    | 221 (42.5)     | 115 (48.73)  | .2732    |
|               | F158V    | 241 (46.35)    | 99 (41.95)   |          |
|               | V158V    | 58 (11.15)     | 22 (9.32)    |          |

\*The P-value was calculated using the Fisher's exact test.

*FCGR*, Fc gamma receptor.

**Supplemental Table 4. Univariate survival analysis of the impact of single nucleotide polymorphism genotype on progression-free survival in patients with diffuse large B-cell lymphoma (DLBCL) in the GOYA trial for each treatment arm (obinutuzumab [G] and rituximab [R]) stratified by cell of origin (COO; activated B-cell [ABC] and germinal center B-cell [GCB]).**

| COO | Biomarker     | Effect         | Treatment | Total (No.) | Subgroup (No.) | HR   | 95% CI lower | 95% CI upper | P-value | Adj. P-value |
|-----|---------------|----------------|-----------|-------------|----------------|------|--------------|--------------|---------|--------------|
| GCB | <i>FCGR2A</i> | R131H vs R131R | R         | 252         | 97 vs 56       | 0.63 | 0.35         | 1.13         | .1190   | .6270        |
| GCB | <i>FCGR2A</i> | H131H vs R131R | R         | 252         | 99 vs 56       | 0.63 | 0.35         | 1.13         | .1183   | .6270        |
| GCB | <i>FCGR2A</i> | R131H vs R131R | G         | 267         | 135 vs 43      | 1.08 | 0.53         | 2.20         | .8255   | .9427        |
| GCB | <i>FCGR2A</i> | H131H vs R131R | G         | 267         | 89 vs 43       | 1.16 | 0.55         | 2.44         | .6949   | .8778        |
| ABC | <i>FCGR2A</i> | R131H vs R131R | R         | 115         | 52 vs 15       | 1.13 | 0.42         | 3.02         | .8136   | .9427        |
| ABC | <i>FCGR2A</i> | H131H vs R131R | R         | 115         | 48 vs 15       | 1.85 | 0.71         | 4.86         | .2111   | .6270        |
| ABC | <i>FCGR2A</i> | R131H vs R131R | G         | 121         | 60 vs 24       | 1.59 | 0.72         | 3.52         | .2521   | .6270        |
| ABC | <i>FCGR2A</i> | H131H vs R131R | G         | 121         | 37 vs 24       | 1.54 | 0.66         | 3.61         | .3180   | .6270        |
| GCB | <i>FCGR2B</i> | I232T vs I232I | R         | 244         | 63 vs 175      | 0.68 | 0.38         | 1.22         | .1967   | .6270        |
| GCB | <i>FCGR2B</i> | T232T vs I232I | R         | 244         | 6 vs 175       | 1.85 | 0.58         | 5.92         | .3011   | .6270        |
| GCB | <i>FCGR2B</i> | I232T vs I232I | G         | 254         | 61 vs 187      | 1.21 | 0.69         | 2.12         | .4960   | .7440        |
| GCB | <i>FCGR2B</i> | T232T vs I232I | G         | 254         | 6 vs 187       | 0.00 | 0.00         | Inf          | .9949   | .9949        |
| ABC | <i>FCGR2B</i> | I232T vs I232I | R         | 114         | 26 vs 86       | 1.16 | 0.60         | 2.25         | .6531   | .8708        |
| ABC | <i>FCGR2B</i> | T232T vs I232I | R         | 114         | 2 vs 86        | 6.91 | 1.61         | 29.64        | .0093   | .2240        |
| ABC | <i>FCGR2B</i> | I232T vs I232I | G         | 117         | 33 vs 80       | 1.45 | 0.79         | 2.67         | .2275   | .6270        |
| ABC | <i>FCGR2B</i> | T232T vs I232I | G         | 117         | 4 vs 80        | 2.12 | 0.50         | 8.90         | .3055   | .6270        |
| GCB | <i>FCGR3A</i> | F158V vs F158F | R         | 252         | 127 vs 98      | 1.28 | 0.78         | 2.12         | .3319   | .6270        |
| GCB | <i>FCGR3A</i> | V158V vs F158F | R         | 252         | 27 vs 98       | 1.06 | 0.46         | 2.45         | .8963   | .9427        |
| GCB | <i>FCGR3A</i> | F158V vs F158F | G         | 268         | 114 vs 123     | 1.27 | 0.76         | 2.11         | .3658   | .6270        |
| GCB | <i>FCGR3A</i> | V158V vs F158F | G         | 268         | 31 vs 123      | 0.73 | 0.30         | 1.79         | .4950   | .7440        |
| ABC | <i>FCGR3A</i> | F158V vs F158F | R         | 115         | 47 vs 55       | 0.56 | 0.29         | 1.09         | .0882   | .6270        |
| ABC | <i>FCGR3A</i> | V158V vs F158F | R         | 115         | 13 vs 55       | 1.45 | 0.66         | 3.20         | .3555   | .6270        |
| ABC | <i>FCGR3A</i> | F158V vs F158F | G         | 121         | 52 vs 60       | 1.04 | 0.58         | 1.84         | .9034   | .9427        |

|     |               |                |   |     |         |      |      |      |       |       |
|-----|---------------|----------------|---|-----|---------|------|------|------|-------|-------|
| ABC | <i>FCGR3A</i> | V158V vs F158F | G | 121 | 9 vs 60 | 0.76 | 0.23 | 2.52 | .6508 | .8708 |
|-----|---------------|----------------|---|-----|---------|------|------|------|-------|-------|

Adj, adjusted; CI, confidence interval; *FCGR*, Fc gamma receptor; HR, hazard ratio.

## Supplemental figures

Supplemental Figure 1. Forest plot representing the (A) univariate and (B and C) multivariate survival analyses of the impact of single nucleotide polymorphism genotype on progression-free survival (PFS) in patients with follicular lymphoma (FL) in the GALLIUM trial.

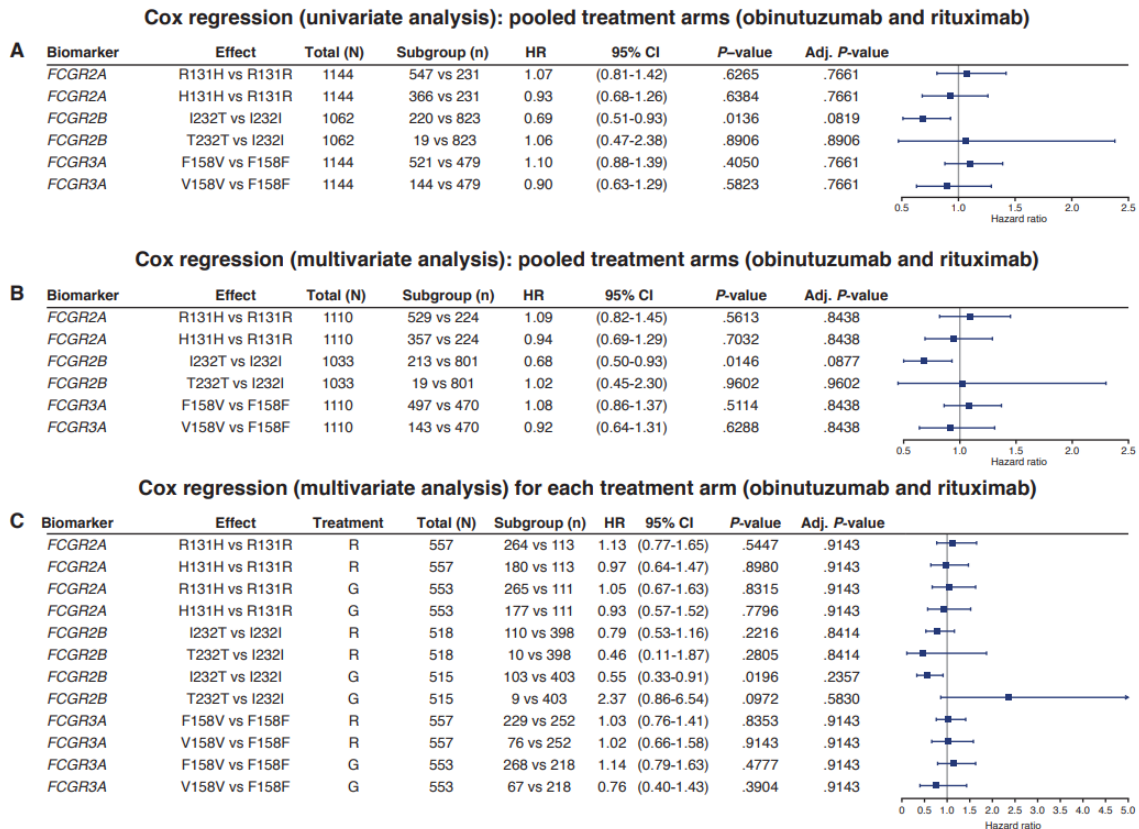

Time to event was defined by PFS (days). All analyses were adjusted and unstratified. Variables for the univariate analysis included biomarker and treatment arm. Variables for the multivariate analysis included biomarker, treatment arm (pooled analysis only), FLIPI and chemotherapy. No interaction terms were included. *P*-value (for hypothesis testing of whether the biomarker effect was equal to zero) was calculated using the Wald test. Adjusted *P*-values were corrected for multiple comparisons using the Benjamini and Hochberg method.

Adj, adjusted; CI, confidence interval; *FCGR*, Fc gamma receptor; HR, hazard ratio.

**Supplemental Figure 2. Forest plot representing the (A) univariate and (B and C) multivariate survival analyses of the impact of single nucleotide polymorphism genotype on progression-free survival (PFS) in patients with diffuse large B-cell lymphoma (DLBCL) in the GOYA trial.**

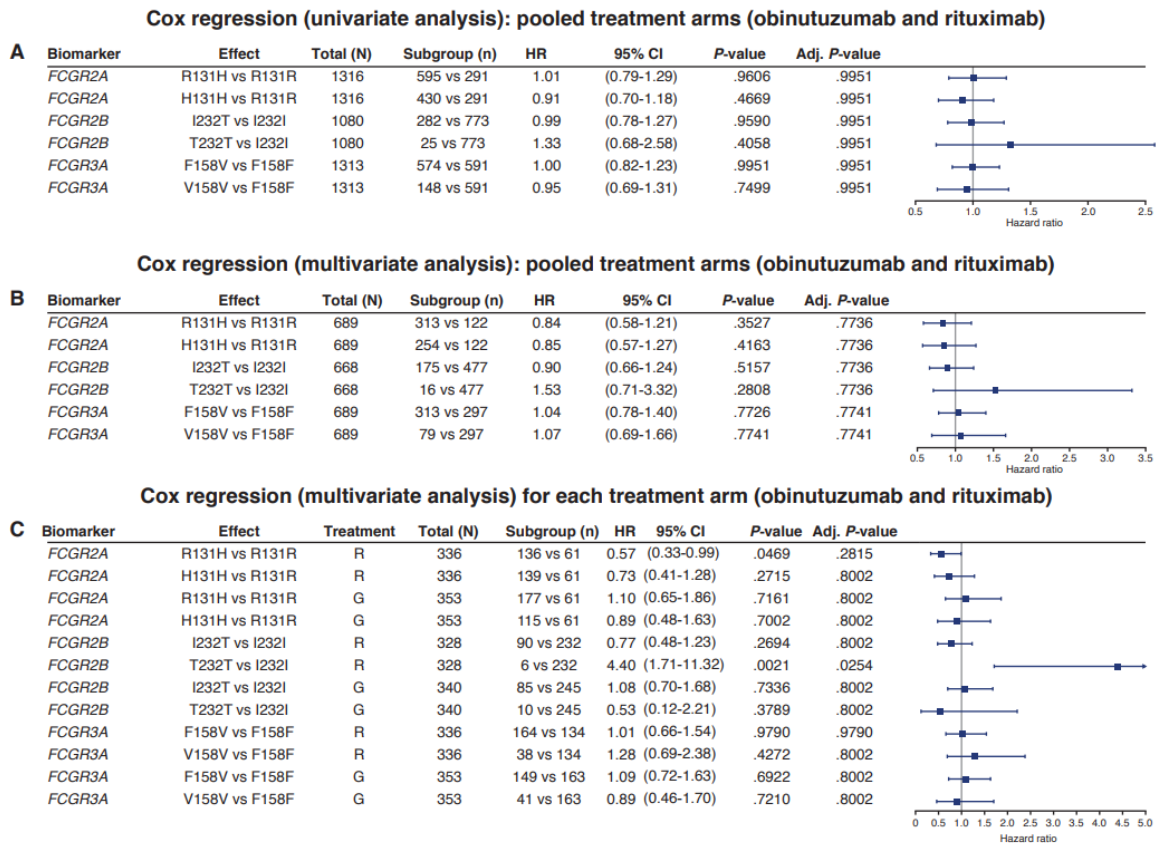

Time to event was defined by PFS (days). All analyses were adjusted and unstratified. Variables for the univariate analysis included biomarker and treatment arm. Variables for the multivariate analysis included biomarker, treatment arm (pooled analysis only), geographic region, number of chemotherapy cycles, IPI categories, COO and BCL2 by IHC. No interaction terms were included. *P*-value (for hypothesis testing of whether the biomarker effect was equal to zero) was calculated using the Wald test. Adjusted *P*-values were corrected for multiple comparisons using the Benjamini and Hochberg method.

Adj, adjusted; CI, confidence interval; *FCGR*, Fc gamma receptor; HR, hazard ratio.



## References

1. Floto RA, Clatworthy MR, Heilbronn KR, et al. Loss of function of a lupus-associated FcγRIIb polymorphism through exclusion from lipid rafts. *Nat Med*. 2005;11(10):1056-1058.
